# Supplementary material for: Control of colloidal placement by modulated molecular orientation in nematic cells
Source: PubMed Central journal article supplement — Sci Adv. 2016 Sep 16;2(9):e1600932. doi: 10.1126/sciadv.1600932 (PMC5026424; doi:10.1126/sciadv.1600932), 2016-09-16
Supplement: 1600932_SM.pdf [file 1600932_SM.pdf]

## Supplementary Materials for **Control of colloidal placement by modulated molecular orientation in nematic cells**

Chenhui Peng, Taras Turiv, Yubing Guo, Sergij V. Shiyankovskii, Qi-Huo Wei, Oleg D. Lavrentovich

Published 16 September 2016, *Sci. Adv.* **2**, e1600932 (2016)

DOI: 10.1126/sciadv.1600932

### **The PDF file includes:**

- fig. S1. Self-assembly of colloids with homeotropic anchoring in the regions of photopatterned splay distortions during the filling of the LC into the cell.
- Legend for movie S1

### **Other Supplementary Material for this manuscript includes the following:** (available at [advances.sciencemag.org/cgi/content/full/2/9/e1600932/DC1](http://advances.sciencemag.org/cgi/content/full/2/9/e1600932/DC1))

- movie S1 (.avi format). Colloidal sphere with dipolar director is transported from one splay region to the next splay distortion due to elastic interaction.

## Supplementary Materials

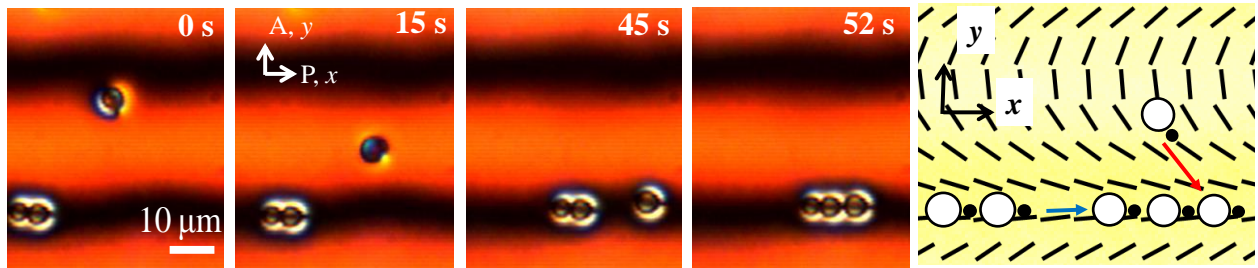

**fig. S1. Self-assembly of colloids with homeotropic anchoring in the regions of photo-patterned splay distortions during filling of the LC into the cell.** Homeotropically anchored colloid of diameter  $5 \mu\text{m}$  migrates from the bend region to the splay region and self-assembles with other homeotropically anchored colloids to form a chain aligned parallel to the stripe direction.

## Supplementary Movies

**movie S1.** This movie file shows the sphere placed by the tweezers in the splay region in such a way that the dipole  $\hat{\mathbf{p}}$  is antiparallel to the  $x$ -axis. This configuration is unstable, since  $\hat{\mathbf{p}}$  should be parallel to the  $x$ -axis in equilibrium. The sphere with the “wrong” orientation of  $\hat{\mathbf{p}}$  moves across the stripe pattern, rotating  $\hat{\mathbf{p}}$  in accordance with the local director, until it reaches the neighboring splay region with  $\hat{\mathbf{p}}$  being parallel to the  $x$ -axis, i.e. completing a 180 degrees rotation through a shift by  $|\Delta y| = l$ . The movie is acquired at 1 frames/s and played at 10 frames/s.
